# Supplementary material for: Solid solution between lithium-rich yttrium and europium molybdate as new efficient red-emitting phosphors
Source: Royal Society of Chemistry journal article supplement (doi:10.1039/c5tc02515j), 2015-12-08
Supplement: c5tc02515j1.pdf [file c5tc02515j1.pdf]

Supplementary information

**Table S1a** Atomic coordinates and isotropic displacement parameters for  $\text{Li}_{3.5}\text{Y}_{1.5}(\text{MoO}_4)_4$  ( $x: 0.00$ ) ( $U_{\text{eq}} = (1/3)\sum_j U_{jj} a_j^* a_j^*$ ).

| Atom   | Position | x/a        | y/b        | z/c        | s.o.f.    | $U_{\text{eq}} / \text{Å}^2$ |
|--------|----------|------------|------------|------------|-----------|------------------------------|
| Li1/Y1 | 2i       | 0.12128(9) | 0.77267(7) | 0.44014(4) | 0.25/0.75 | 0.0109(2)                    |
| Mo1    | 2i       | 0.33632(6) | 0.29999(5) | 0.32035(3) |           | 0.0119(1)                    |
| Mo2    | 2i       | 0.41737(7) | 0.15377(6) | 0.80009(3) |           | 0.0135(2)                    |
| O1     | 2i       | 0.1154(6)  | 0.1162(5)  | 0.4072(3)  |           | 0.0156(5)                    |
| O2     | 2i       | 0.3013(6)  | 0.5639(5)  | 0.5714(3)  |           | 0.0178(5)                    |
| O3     | 2i       | 0.3567(7)  | 0.1754(5)  | 0.1622(3)  |           | 0.0209(6)                    |
| O4     | 2i       | 0.1984(6)  | 0.4994(5)  | 0.2944(3)  |           | 0.0174(5)                    |
| O5     | 2i       | 0.2703(7)  | 0.6860(6)  | 0.0691(3)  |           | 0.0252(6)                    |
| O6     | 2i       | 0.2268(7)  | 0.3241(5)  | 0.7720(3)  |           | 0.0206(6)                    |
| O7     | 2i       | 0.8008(7)  | 0.0584(5)  | 0.1382(3)  |           | 0.0207(6)                    |
| O8     | 2i       | 0.4850(6)  | 0.0419(5)  | 0.6409(3)  |           | 0.0170(5)                    |
| Li2    | 1a       | 0          | 0          | 0          |           | 0.053(4)                     |
| Li3    | 2i       | 0.839(3)   | 0.412(2)   | 0.121(2)   |           | 0.056(3)                     |

**Table S1b** Atomic coordinates and isotropic displacement parameters for  $\text{Li}_{3.5}(\text{Y}_{0.90}\text{Eu}_{0.10})_{1.5}(\text{MoO}_4)_4$  ( $x: 0.10$ ) ( $U_{\text{eq}} = (1/3)\sum_j U_{jj} a_j^* a_j^*$ ).

| Atom       | Position | x/a        | y/b        | z/c        | s.o.f.           | $U_{\text{eq}} / \text{Å}^2$ |
|------------|----------|------------|------------|------------|------------------|------------------------------|
| Li1/Y1/Eu1 | 2i       | 0.12138(9) | 0.77258(7) | 0.44004(4) | 0.25/0.675/0.075 | 0.0083(1)                    |
| Mo1        | 2i       | 0.33622(7) | 0.29991(5) | 0.32023(3) |                  | 0.0096(1)                    |
| Mo2        | 2i       | 0.41688(7) | 0.15396(6) | 0.80032(3) |                  | 0.0114(1)                    |
| O1         | 2i       | 0.1156(6)  | 0.1167(5)  | 0.4068(3)  |                  | 0.0123(5)                    |
| O2         | 2i       | 0.3017(6)  | 0.5640(5)  | 0.5712(3)  |                  | 0.0152(6)                    |
| O3         | 2i       | 0.3561(7)  | 0.1747(5)  | 0.1624(3)  |                  | 0.0187(6)                    |
| O4         | 2i       | 0.1984(7)  | 0.4993(5)  | 0.2938(3)  |                  | 0.0148(6)                    |
| O5         | 2i       | 0.2702(8)  | 0.6863(6)  | 0.0695(3)  |                  | 0.0231(7)                    |
| O6         | 2i       | 0.2268(7)  | 0.3241(5)  | 0.7725(3)  |                  | 0.0188(6)                    |
| O7         | 2i       | 0.8019(7)  | 0.0584(6)  | 0.1389(3)  |                  | 0.0183(6)                    |
| O8         | 2i       | 0.4854(6)  | 0.0427(5)  | 0.6414(3)  |                  | 0.0155(6)                    |
| Li2        | 1a       | 0          | 0          | 0          |                  | 0.055(4)                     |
| Li3        | 2i       | 0.842(3)   | 0.405(2)   | 0.124(2)   |                  | 0.050(3)                     |

**Table S1c** Atomic coordinates and isotropic displacement parameters for  $\text{Li}_{3.5}(\text{Y}_{0.75}\text{Eu}_{0.25})_{1.5}(\text{MoO}_4)_4$  ( $x: 0.25$ ) ( $U_{\text{eq}} = (1/3)\sum_j U_{jj} a_j^* a_j^*$ ).

| Atom       | Position | x/a        | y/b        | z/c        | s.o.f.             | $U_{\text{eq}} / \text{Å}^2$ |
|------------|----------|------------|------------|------------|--------------------|------------------------------|
| Li1/Y1/Eu1 | 2i       | 0.12066(7) | 0.77234(5) | 0.43995(3) | 0.25/0.5625/0.1875 | 0.0099(1)                    |
| Mo1        | 2i       | 0.33560(6) | 0.30000(5) | 0.31983(3) |                    | 0.0111(1)                    |
| Mo2        | 2i       | 0.41767(7) | 0.15410(5) | 0.80083(3) |                    | 0.0127(1)                    |
| O1         | 2i       | 0.1164(5)  | 0.1171(4)  | 0.4065(3)  |                    | 0.0143(5)                    |
| O2         | 2i       | 0.3033(6)  | 0.5643(4)  | 0.5717(3)  |                    | 0.0174(5)                    |
| O3         | 2i       | 0.3569(6)  | 0.1756(5)  | 0.1618(3)  |                    | 0.0199(5)                    |
| O4         | 2i       | 0.1962(6)  | 0.4984(4)  | 0.2936(3)  |                    | 0.0168(5)                    |
| O5         | 2i       | 0.2686(7)  | 0.6866(5)  | 0.0686(3)  |                    | 0.0249(6)                    |
| O6         | 2i       | 0.2287(6)  | 0.3251(5)  | 0.7733(3)  |                    | 0.0205(6)                    |
| O7         | 2i       | 0.8011(6)  | 0.0575(5)  | 0.1378(3)  |                    | 0.0198(5)                    |
| O8         | 2i       | 0.4859(6)  | 0.0435(4)  | 0.6420(3)  |                    | 0.0166(5)                    |
| Li2        | 1a       | 0          | 0          | 0          |                    | 0.059(4)                     |
| Li3        | 2i       | 0.841(3)   | 0.404(2)   | 0.125(2)   |                    | 0.053(3)                     |

**Table S1d** Atomic coordinates and isotropic displacement parameters for  $\text{Li}_{3.5}(\text{Y}_{0.50}\text{Eu}_{0.50})_{1.5}(\text{MoO}_4)_4$  ( $x: 0.50$ ) ( $U_{\text{eq}} = (1/3)\sum_j U_{jj} a_j^* a_j$ ).

| Atom       | Position | $x/a$      | $y/b$      | $z/c$      | s.o.f.           | $U_{\text{eq}} / \text{\AA}^2$ |
|------------|----------|------------|------------|------------|------------------|--------------------------------|
| Li1/Eu1/Y1 | 2i       | 0.12033(7) | 0.77205(6) | 0.43980(3) | 0.25/0.375/0.375 | 0.0085(1)                      |
| Mo1        | 2i       | 0.33484(7) | 0.29990(6) | 0.31928(4) |                  | 0.0103(1)                      |
| Mo2        | 2i       | 0.41777(8) | 0.15446(7) | 0.80161(4) |                  | 0.0120(1)                      |
| O1         | 2i       | 0.1184(6)  | 0.1175(5)  | 0.4056(3)  |                  | 0.0126(6)                      |
| O2         | 2i       | 0.3048(6)  | 0.5650(5)  | 0.5721(3)  |                  | 0.0157(6)                      |
| O3         | 2i       | 0.3557(7)  | 0.1757(6)  | 0.1620(3)  |                  | 0.0179(7)                      |
| O4         | 2i       | 0.1945(7)  | 0.4965(5)  | 0.2931(3)  |                  | 0.0149(6)                      |
| O5         | 2i       | 0.2685(8)  | 0.6877(6)  | 0.0687(3)  |                  | 0.0249(8)                      |
| O6         | 2i       | 0.2313(7)  | 0.3252(6)  | 0.7739(3)  |                  | 0.0200(7)                      |
| O7         | 2i       | 0.8003(7)  | 0.0563(6)  | 0.1378(3)  |                  | 0.0183(7)                      |
| O8         | 2i       | 0.4837(6)  | 0.0439(5)  | 0.6429(3)  |                  | 0.0159(6)                      |
| Li2        | 1a       | 0          | 0          | 0          |                  | 0.053(5)                       |
| Li3        | 2i       | 0.831(3)   | 0.397(3)   | 0.125(2)   |                  | 0.061(4)                       |

**Table S1e** Atomic coordinates and isotropic displacement parameters for  $\text{Li}_{3.5}(\text{Y}_{0.25}\text{Eu}_{0.75})_{1.5}(\text{MoO}_4)_4$  ( $x: 0.75$ ) ( $U_{\text{eq}} = (1/3)\sum_j U_{jj} a_j^* a_j$ ).

| Atom       | Position | $x/a$      | $y/b$      | $z/c$      | s.o.f.             | $U_{\text{eq}} / \text{\AA}^2$ |
|------------|----------|------------|------------|------------|--------------------|--------------------------------|
| Li1/Y1/Eu1 | 2i       | 0.12001(6) | 0.77183(5) | 0.43964(3) | 0.25/0.1875/0.5625 | 0.0094(1)                      |
| Mo1        | 2i       | 0.33420(7) | 0.29986(5) | 0.31873(3) |                    | 0.0106(1)                      |
| Mo2        | 2i       | 0.41808(8) | 0.15474(6) | 0.80227(3) |                    | 0.0123(1)                      |
| O1         | 2i       | 0.1196(6)  | 0.1175(5)  | 0.4049(3)  |                    | 0.0129(6)                      |
| O2         | 2i       | 0.3063(7)  | 0.5643(5)  | 0.5725(3)  |                    | 0.0158(6)                      |
| O3         | 2i       | 0.3562(7)  | 0.1753(6)  | 0.1615(3)  |                    | 0.0192(6)                      |
| O4         | 2i       | 0.1922(7)  | 0.4953(5)  | 0.2921(3)  |                    | 0.0166(6)                      |
| O5         | 2i       | 0.2683(8)  | 0.6894(6)  | 0.0691(3)  |                    | 0.0241(7)                      |
| O6         | 2i       | 0.2320(7)  | 0.3259(5)  | 0.7752(3)  |                    | 0.0193(6)                      |
| O7         | 2i       | 0.7997(7)  | 0.0556(6)  | 0.1368(3)  |                    | 0.0194(6)                      |
| O8         | 2i       | 0.4826(7)  | 0.0445(5)  | 0.6429(3)  |                    | 0.0159(6)                      |
| Li2        | 1a       | 0          | 0          | 0          |                    | 0.064(5)                       |
| Li3        | 2i       | 0.839(3)   | 0.403(2)   | 0.124(2)   |                    | 0.053(3)                       |

**Table S1f** Atomic coordinates and isotropic displacement parameters for  $\text{Li}_{3.5}\text{Eu}_{1.5}(\text{MoO}_4)_4$  ( $x: 1.00$ ) ( $U_{\text{eq}} = (1/3)\sum_j U_{jj} a_j^* a_j$ ).

| Atom    | Position | $x/a$      | $y/b$      | $z/c$      | s.o.f.    | $U_{\text{eq}} / \text{\AA}^2$ |
|---------|----------|------------|------------|------------|-----------|--------------------------------|
| Li1/Eu1 | 2i       | 0.11989(4) | 0.77156(4) | 0.43946(2) | 0.25/0.75 | 0.0095(1)                      |
| Mo1     | 2i       | 0.33392(6) | 0.29982(5) | 0.31824(3) |           | 0.0104(1)                      |
| Mo2     | 2i       | 0.41798(7) | 0.15515(6) | 0.80287(3) |           | 0.0121(1)                      |
| O1      | 2i       | 0.1204(5)  | 0.1170(5)  | 0.4046(3)  |           | 0.0135(5)                      |
| O2      | 2i       | 0.3074(5)  | 0.5645(5)  | 0.5730(3)  |           | 0.0170(6)                      |
| O3      | 2i       | 0.3555(6)  | 0.1745(5)  | 0.1615(3)  |           | 0.0196(6)                      |
| O4      | 2i       | 0.1912(6)  | 0.4943(5)  | 0.2915(3)  |           | 0.0161(6)                      |
| O5      | 2i       | 0.2689(6)  | 0.6893(6)  | 0.0687(3)  |           | 0.0231(7)                      |
| O6      | 2i       | 0.2333(6)  | 0.3266(5)  | 0.7764(3)  |           | 0.0188(6)                      |
| O7      | 2i       | 0.7991(6)  | 0.0555(5)  | 0.1366(3)  |           | 0.0193(6)                      |
| O8      | 2i       | 0.4810(5)  | 0.0453(5)  | 0.6435(3)  |           | 0.0159(6)                      |
| Li2     | 1a       | 0          | 0          | 0          |           | 0.045(3)                       |
| Li3     | 2i       | 0.829(3)   | 0.403(3)   | 0.120(2)   |           | 0.063(3)                       |

**Table S2a** Anisotropic displacement parameters of  $\text{Li}_{3.5}\text{Y}_{1.5}(\text{MoO}_4)_4$  ( $x$ : 0.00).

| Atom   | $U_{11}$    | $U_{22}$   | $U_{33}$    | $U_{12}$    | $U_{13}$    | $U_{23}$    |
|--------|-------------|------------|-------------|-------------|-------------|-------------|
| Li1/Y1 | 0.0106(3)   | 0.0122(3)  | 0.0110(3)   | 0.0056(2)   | 0.0037(2)   | 0.0033(2)   |
| Mo1    | 0.01103(19) | 0.0139(2)  | 0.01217(19) | 0.00595(14) | 0.00398(13) | 0.00431(14) |
| Mo2    | 0.0142(2)   | 0.0175(2)  | 0.01087(19) | 0.00847(14) | 0.00439(12) | 0.00308(13) |
| O1     | 0.0183(13)  | 0.0149(12) | 0.0166(12)  | 0.0090(11)  | 0.0068(10)  | 0.0046(10)  |
| O2     | 0.0154(13)  | 0.0182(13) | 0.0197(13)  | 0.0072(11)  | 0.0035(11)  | 0.0054(11)  |
| O3     | 0.0185(14)  | 0.0248(15) | 0.0190(13)  | 0.0112(12)  | 0.0045(11)  | 0.0008(11)  |
| O4     | 0.0214(14)  | 0.0183(13) | 0.0173(12)  | 0.0126(12)  | 0.0064(11)  | 0.0051(11)  |
| O5     | 0.0226(16)  | 0.0293(17) | 0.0178(13)  | 0.0061(13)  | 0.0019(12)  | 0.0062(12)  |
| O6     | 0.0220(15)  | 0.0199(14) | 0.0237(13)  | 0.0120(12)  | 0.0073(12)  | 0.0066(12)  |
| O7     | 0.0231(15)  | 0.0246(15) | 0.0201(13)  | 0.0129(13)  | 0.0095(11)  | 0.0092(12)  |
| O8     | 0.0171(13)  | 0.0176(13) | 0.0168(12)  | 0.0076(11)  | 0.0076(10)  | 0.0019(10)  |

**Table S2b** Anisotropic displacement parameters of  $\text{Li}_{3.5}(\text{Y}_{0.90}\text{Eu}_{0.10})_{1.5}(\text{MoO}_4)_4$  ( $x$ : 0.10).

| Atom       | $U_{11}$    | $U_{22}$    | $U_{33}$    | $U_{12}$    | $U_{13}$    | $U_{23}$    |
|------------|-------------|-------------|-------------|-------------|-------------|-------------|
| Li1/Y1/Eu1 | 0.0088(2)   | 0.0071(2)   | 0.0097(2)   | 0.00359(17) | 0.00319(15) | 0.00211(16) |
| Mo1        | 0.00886(18) | 0.00936(18) | 0.01106(18) | 0.00365(13) | 0.00355(12) | 0.00359(12) |
| Mo2        | 0.01222(19) | 0.01321(19) | 0.00962(18) | 0.00631(14) | 0.00366(12) | 0.00235(12) |
| O1         | 0.0120(13)  | 0.0115(13)  | 0.0140(12)  | 0.0047(11)  | 0.005(1)    | 0.0039(10)  |
| O2         | 0.0138(14)  | 0.0126(13)  | 0.0168(13)  | 0.0032(11)  | 0.0038(11)  | 0.0037(11)  |
| O3         | 0.0163(14)  | 0.0204(15)  | 0.0183(14)  | 0.0089(12)  | 0.0044(11)  | -0.0006(11) |
| O4         | 0.0204(15)  | 0.0120(13)  | 0.0159(13)  | 0.0097(12)  | 0.0080(11)  | 0.0032(10)  |
| O5         | 0.0228(17)  | 0.0246(17)  | 0.0132(14)  | 0.0042(14)  | -0.0002(12) | 0.0022(12)  |
| O6         | 0.0217(16)  | 0.0158(14)  | 0.0210(15)  | 0.0106(13)  | 0.0073(12)  | 0.0023(12)  |
| O7         | 0.0178(15)  | 0.0213(15)  | 0.0204(14)  | 0.0101(13)  | 0.0085(11)  | 0.0092(12)  |
| O8         | 0.0148(14)  | 0.0135(13)  | 0.0167(13)  | 0.0046(11)  | 0.0068(11)  | 0.0012(11)  |

**Table S2c** Anisotropic displacement parameters of  $\text{Li}_{3.5}(\text{Y}_{0.75}\text{Eu}_{0.25})_{1.5}(\text{MoO}_4)_4$  ( $x$ : 0.25).

| Atom       | $U_{11}$    | $U_{22}$    | $U_{33}$    | $U_{12}$    | $U_{13}$    | $U_{23}$    |
|------------|-------------|-------------|-------------|-------------|-------------|-------------|
| Li1/Y1/Eu1 | 0.0111(2)   | 0.0101(2)   | 0.0102(2)   | 0.00552(16) | 0.00327(15) | 0.00362(16) |
| Mo1        | 0.01137(18) | 0.01234(19) | 0.01146(19) | 0.00587(13) | 0.00377(12) | 0.00499(13) |
| Mo2        | 0.01446(19) | 0.01572(19) | 0.00996(18) | 0.00821(13) | 0.00377(12) | 0.00361(12) |
| O1         | 0.0166(12)  | 0.0145(11)  | 0.0146(12)  | 0.0094(10)  | 0.0042(9)   | 0.0044(9)   |
| O2         | 0.0160(13)  | 0.0173(12)  | 0.0171(13)  | 0.0055(10)  | 0.0028(10)  | 0.0052(10)  |
| O3         | 0.0187(13)  | 0.0237(13)  | 0.0167(13)  | 0.0108(11)  | 0.0038(10)  | 0.0008(10)  |
| O4         | 0.0208(13)  | 0.0164(11)  | 0.0173(13)  | 0.0111(10)  | 0.0064(10)  | 0.0051(9)   |
| O5         | 0.0243(15)  | 0.0260(14)  | 0.0161(14)  | 0.0039(12)  | 0.0018(11)  | 0.0038(11)  |
| O6         | 0.0233(14)  | 0.0193(12)  | 0.0230(14)  | 0.0123(11)  | 0.0084(11)  | 0.0058(11)  |
| O7         | 0.0215(14)  | 0.0249(13)  | 0.0192(13)  | 0.0132(11)  | 0.0091(11)  | 0.0095(11)  |
| O8         | 0.0154(12)  | 0.0174(11)  | 0.0166(12)  | 0.0057(10)  | 0.0071(10)  | 0.0035(10)  |

**Table S2d** Anisotropic displacement parameters of  $\text{Li}_{3.5}(\text{Y}_{0.50}\text{Eu}_{0.50})_{1.5}(\text{MoO}_4)_4$  ( $x$ : 0.50).

| Atom       | $U_{11}$    | $U_{22}$   | $U_{33}$    | $U_{12}$    | $U_{13}$    | $U_{23}$    |
|------------|-------------|------------|-------------|-------------|-------------|-------------|
| Li1/Y1/Eu1 | 0.00842(19) | 0.0074(2)  | 0.0088(2)   | 0.00290(15) | 0.00219(14) | 0.00092(15) |
| Mo1        | 0.00935(19) | 0.0106(2)  | 0.0105(2)   | 0.00381(15) | 0.00283(14) | 0.00272(15) |
| Mo2        | 0.0124(2)   | 0.0142(2)  | 0.00903(19) | 0.00601(15) | 0.00306(14) | 0.00147(14) |
| O1         | 0.0123(13)  | 0.0089(14) | 0.0174(15)  | 0.0040(12)  | 0.0060(11)  | 0.0044(12)  |
| O2         | 0.0129(14)  | 0.0148(16) | 0.0153(14)  | 0.0024(12)  | 0.0022(11)  | 0.0030(12)  |
| O3         | 0.0164(14)  | 0.0223(17) | 0.0140(15)  | 0.0096(13)  | 0.0044(12)  | -0.0013(13) |
| O4         | 0.0186(14)  | 0.0114(14) | 0.0151(14)  | 0.0073(12)  | 0.0041(12)  | 0.0021(12)  |
| O5         | 0.0234(16)  | 0.0257(19) | 0.0155(16)  | 0.0019(15)  | 0.0015(13)  | 0.0040(14)  |
| O6         | 0.0211(16)  | 0.0192(17) | 0.0218(17)  | 0.0120(14)  | 0.0060(13)  | 0.0025(14)  |
| O7         | 0.0167(15)  | 0.0224(18) | 0.0181(15)  | 0.0078(13)  | 0.0078(12)  | 0.0083(14)  |
| O8         | 0.0150(14)  | 0.0140(15) | 0.0173(15)  | 0.0047(13)  | 0.0060(12)  | 0.0021(12)  |

**Table S2e** Anisotropic displacement parameters of  $\text{Li}_{3.5}(\text{Y}_{0.25}\text{Eu}_{0.75})_{1.5}(\text{MoO}_4)_4$  ( $x$ : 0.75).

| Atom       | $U_{11}$    | $U_{22}$    | $U_{33}$    | $U_{12}$    | $U_{13}$    | $U_{23}$    |
|------------|-------------|-------------|-------------|-------------|-------------|-------------|
| Li1/Y1/Eu1 | 0.01071(17) | 0.00821(16) | 0.00922(15) | 0.00370(12) | 0.00345(11) | 0.00214(11) |
| Mo1        | 0.01118(19) | 0.01089(19) | 0.01052(17) | 0.00443(15) | 0.00403(13) | 0.00367(13) |
| Mo2        | 0.01411(19) | 0.01454(19) | 0.00907(16) | 0.00657(15) | 0.00402(13) | 0.00254(12) |
| O1         | 0.0133(13)  | 0.0119(14)  | 0.0158(12)  | 0.0056(11)  | 0.0067(11)  | 0.0052(10)  |
| O2         | 0.0155(15)  | 0.0130(14)  | 0.0162(13)  | 0.0030(12)  | 0.0039(11)  | 0.0044(11)  |
| O3         | 0.0170(15)  | 0.0227(17)  | 0.0162(13)  | 0.0093(14)  | 0.0036(11)  | -0.0002(12) |
| O4         | 0.0197(15)  | 0.0152(14)  | 0.0155(13)  | 0.0084(13)  | 0.0042(11)  | 0.0041(11)  |
| O5         | 0.0221(17)  | 0.0264(18)  | 0.0142(13)  | 0.0028(15)  | 0.0016(12)  | 0.0023(12)  |
| O6         | 0.0218(16)  | 0.0168(16)  | 0.0205(14)  | 0.0095(14)  | 0.0065(12)  | 0.0036(12)  |
| O7         | 0.0207(16)  | 0.0252(17)  | 0.0180(13)  | 0.0116(14)  | 0.0095(12)  | 0.0102(12)  |
| O8         | 0.0154(15)  | 0.0156(15)  | 0.0150(13)  | 0.0038(12)  | 0.0067(11)  | 0.0030(11)  |

**Table S2f** Anisotropic displacement parameters of  $\text{Li}_{3.5}(\text{Eu}_{1.5}(\text{MoO}_4)_4)$  ( $x$ : 1.00).

| Atom    | $U_{11}$    | $U_{22}$    | $U_{33}$    | $U_{12}$    | $U_{13}$    | $U_{23}$    |
|---------|-------------|-------------|-------------|-------------|-------------|-------------|
| Eu1/Eu1 | 0.00999(13) | 0.00818(14) | 0.01075(14) | 0.00354(10) | 0.00375(10) | 0.0028(1)   |
| Mo1     | 0.01014(16) | 0.01072(19) | 0.01162(17) | 0.00447(13) | 0.00437(13) | 0.00458(14) |
| Mo2     | 0.01302(16) | 0.01416(19) | 0.01011(17) | 0.00632(13) | 0.00420(12) | 0.00321(13) |
| O1      | 0.0135(10)  | 0.0109(13)  | 0.0183(13)  | 0.0053(10)  | 0.0076(10)  | 0.0052(11)  |
| O2      | 0.0157(11)  | 0.0155(15)  | 0.0177(14)  | 0.0036(10)  | 0.0042(10)  | 0.0063(11)  |
| O3      | 0.0173(12)  | 0.0234(16)  | 0.0184(14)  | 0.0102(12)  | 0.0064(10)  | 0.0007(12)  |
| O4      | 0.0210(12)  | 0.0146(14)  | 0.0170(14)  | 0.0103(11)  | 0.0072(10)  | 0.0062(11)  |
| O5      | 0.0224(13)  | 0.0247(17)  | 0.0157(14)  | 0.0043(12)  | 0.0022(11)  | 0.0054(13)  |
| O6      | 0.0206(13)  | 0.0184(16)  | 0.0198(15)  | 0.0110(11)  | 0.0056(11)  | 0.0047(12)  |
| O7      | 0.0200(13)  | 0.0234(16)  | 0.0206(14)  | 0.0112(12)  | 0.0102(11)  | 0.0107(13)  |
| O8      | 0.0135(11)  | 0.0156(14)  | 0.0179(14)  | 0.0043(10)  | 0.0071(10)  | 0.0041(11)  |

**Table S3a** Interatomic distances in  $\text{Li}_{3.5}(\text{Y}_{1-x}\text{Eu}_x)_{1.5}(\text{MoO}_4)_4$  ( $x$ : 0.00, 0.10, 0.25, 0.50, 0.75, 1.00) in the  $[\text{M1O}_8]$ -polyhedra ( $\text{M1}$ : 75%  $(\text{Y}_{1-x}\text{Eu}_x)$  + 25% Li) in Å.

| $d(\text{M1},\text{O}_x)$ | Sym. $\text{O}_x$ | $x$ : 0.00 | $x$ : 0.10 | $x$ : 0.25 | $x$ : 0.50 | $x$ : 0.75 | $x$ : 1.00 |
|---------------------------|-------------------|------------|------------|------------|------------|------------|------------|
| $d(\text{M1},\text{O1})$  | $x, 1+y, z$       | 2.374(3)   | 2.382(3)   | 2.389(2)   | 2.400(3)   | 2.407(3)   | 2.417(3)   |
| $d(\text{M1},\text{O1})$  | $-x, 1-y, 1-z$    | 2.338(3)   | 2.345(3)   | 2.350(2)   | 2.370(3)   | 2.384(3)   | 2.395(3)   |
| $d(\text{M1},\text{O2})$  | $x, y, z$         | 2.405(3)   | 2.407(3)   | 2.417(3)   | 2.425(3)   | 2.441(3)   | 2.452(3)   |
| $d(\text{M1},\text{O2})$  | $-x, 1-y, 1-z$    | 2.442(3)   | 2.449(3)   | 2.454(3)   | 2.467(3)   | 2.473(3)   | 2.482(3)   |
| $d(\text{M1},\text{O4})$  | $x, y, z$         | 2.345(3)   | 2.350(3)   | 2.352(2)   | 2.364(3)   | 2.373(3)   | 2.383(3)   |
| $d(\text{M1},\text{O6})$  | $-x, 1-y, 1-z$    | 2.380(3)   | 2.385(3)   | 2.393(3)   | 2.405(3)   | 2.417(3)   | 2.430(3)   |
| $d(\text{M1},\text{O8})$  | $x, 1+y, z$       | 2.411(3)   | 2.419(3)   | 2.429(3)   | 2.438(3)   | 2.442(3)   | 2.453(3)   |
| $d(\text{M1},\text{O8})$  | $1-x, 1-y, 1-z$   | 2.338(3)   | 2.341(3)   | 2.347(3)   | 2.367(3)   | 2.376(3)   | 2.391(3)   |

**Table S3b** Interatomic distances in  $\text{Li}_{3.5}(\text{Y}_{1-x}\text{Eu}_x)_{1.5}(\text{MoO}_4)_4$  ( $x$ : 0.00, 0.10, 0.25, 0.50, 0.75, 1.00) in the  $[\text{Mo1O}_4]$ -tetrahedra in Å.

| $d(\text{Mo1},\text{O}_x)$ | Sym. $\text{O}_x$ | $x$ : 0.00 | $x$ : 0.10 | $x$ : 0.25 | $x$ : 0.50 | $x$ : 0.75 | $x$ : 1.00 |
|----------------------------|-------------------|------------|------------|------------|------------|------------|------------|
| $d(\text{Mo1},\text{O1})$  | $x, y, z$         | 1.816(3)   | 1.814(3)   | 1.813(3)   | 1.807(3)   | 1.806(3)   | 1.811(3)   |
| $d(\text{Mo1},\text{O2})$  | $1-x, 1-y, 1-z$   | 1.795(3)   | 1.797(3)   | 1.794(3)   | 1.795(3)   | 1.794(3)   | 1.792(3)   |
| $d(\text{Mo1},\text{O3})$  | $x, y, z$         | 1.729(3)   | 1.729(3)   | 1.733(3)   | 1.728(3)   | 1.733(3)   | 1.730(3)   |
| $d(\text{Mo1},\text{O4})$  | $x, y, z$         | 1.760(3)   | 1.764(3)   | 1.765(2)   | 1.762(3)   | 1.766(3)   | 1.769(3)   |

**Table S3c** Interatomic distances in  $\text{Li}_{3.5}(\text{Y}_{1-x}\text{Eu}_x)_{1.5}(\text{MoO}_4)_4$  ( $x$ : 0.00, 0.10, 0.25, 0.50, 0.75, 1.00) in the  $[\text{Mo2O}_4]$ -tetrahedra in Å.

| $d(\text{Mo2},\text{O}_x)$ | Sym. $\text{O}_x$ | $x$ : 0.00 | $x$ : 0.10 | $x$ : 0.25 | $x$ : 0.50 | $x$ : 0.75 | $x$ : 1.00 |
|----------------------------|-------------------|------------|------------|------------|------------|------------|------------|
| $d(\text{Mo2},\text{O5})$  | $1-x, 1-y, 1-z$   | 1.732(3)   | 1.732(3)   | 1.737(3)   | 1.733(4)   | 1.728(3)   | 1.724(3)   |
| $d(\text{Mo2},\text{O6})$  | $x, y, z$         | 1.785(3)   | 1.784(3)   | 1.787(3)   | 1.781(3)   | 1.784(3)   | 1.784(3)   |
| $d(\text{Mo2},\text{O7})$  | $1-x, -y, 1-z$    | 1.744(3)   | 1.744(3)   | 1.747(3)   | 1.743(3)   | 1.747(3)   | 1.749(3)   |
| $d(\text{Mo2},\text{O8})$  | $x, y, z$         | 1.823(3)   | 1.823(3)   | 1.822(3)   | 1.818(3)   | 1.822(3)   | 1.818(3)   |

**Table S3d** Interatomic distances in  $\text{Li}_{3.5}(\text{Y}_{1-x}\text{Eu}_x)_{1.5}(\text{MoO}_4)_4$  ( $x$ : 0.00, 0.10, 0.25, 0.50, 0.75, 1.00) in the  $[\text{Li2O}_4]$ -polyhedra in Å.

| $d(\text{Li2},\text{O}_x)$ | Sym. $\text{O}_x$ | $x$ : 0.00 | $x$ : 0.10 | $x$ : 0.25 | $x$ : 0.50 | $x$ : 0.75 | $x$ : 1.00 |
|----------------------------|-------------------|------------|------------|------------|------------|------------|------------|
| $d(\text{Li2},\text{O3})$  | $x, y, z$         | 2.042(3)   | 2.043(3)   | 2.043(3)   | 2.044(3)   | 2.044(3)   | 2.046(3)   |
| $d(\text{Li2},\text{O3})$  | $-x, -y, -z$      | 2.042(3)   | 2.043(3)   | 2.043(3)   | 2.044(3)   | 2.044(3)   | 2.046(3)   |
| $d(\text{Li2},\text{O7})$  | $1-x, -y, -z$     | 1.966(3)   | 1.969(3)   | 1.963(3)   | 1.969(3)   | 1.965(3)   | 1.970(3)   |
| $d(\text{Li2},\text{O7})$  | $-1+x, y, z$      | 1.966(3)   | 1.969(3)   | 1.963(3)   | 1.969(3)   | 1.965(3)   | 1.970(3)   |
| $d(\text{Li2},\text{O5})$  | $x, -1+y, z$      | 3.027(5)   | 3.031(5)   | 3.025(4)   | 3.026(5)   | 3.023(5)   | 3.034(5)   |
| $d(\text{Li2},\text{O5})$  | $-x, 1-y, -z$     | 3.027(5)   | 3.031(5)   | 3.025(4)   | 3.026(5)   | 3.023(5)   | 3.034(5)   |

**Table S3e** Interatomic distances in  $\text{Li}_{3.5}(\text{Y}_{1-x}\text{Eu}_x)_{1.5}(\text{MoO}_4)_4$  ( $x$ : 0.00, 0.10, 0.25, 0.50, 0.75, 1.00) in the  $[\text{Li3O}_6]$ -octahedra in Å.

| $d(\text{Li3},\text{O}_x)$ | Sym. $\text{O}_x$ | $x$ : 0.00 | $x$ : 0.10 | $x$ : 0.25 | $x$ : 0.50 | $x$ : 0.75 | $x$ : 1.00 |
|----------------------------|-------------------|------------|------------|------------|------------|------------|------------|
| $d(\text{Li3},\text{O3})$  | $x, y, z$         | 2.566(15)  | 2.557(14)  | 2.548(13)  | 2.506(16)  | 2.555(15)  | 2.606(16)  |
| $d(\text{Li3},\text{O4})$  | $1+x, y, z$       | 2.151(15)  | 2.112(14)  | 2.102(14)  | 2.127(17)  | 2.104(14)  | 2.085(17)  |
| $d(\text{Li3},\text{O5})$  | $1+x, y, z$       | 2.513(15)  | 2.544(14)  | 2.555(14)  | 2.622(16)  | 2.580(15)  | 2.543(16)  |
| $d(\text{Li3},\text{O5})$  | $1-x, 1-y, -z$    | 1.855(15)  | 1.892(14)  | 1.890(15)  | 1.889(18)  | 1.884(14)  | 1.894(17)  |
| $d(\text{Li3},\text{O6})$  | $1-x, 1-y, 1-z$   | 2.077(15)  | 2.105(14)  | 2.108(13)  | 2.131(17)  | 2.122(15)  | 2.079(16)  |
| $d(\text{Li3},\text{O7})$  | $x, y, z$         | 2.319(15)  | 2.273(14)  | 2.271(13)  | 2.252(17)  | 2.293(14)  | 2.365(15)  |

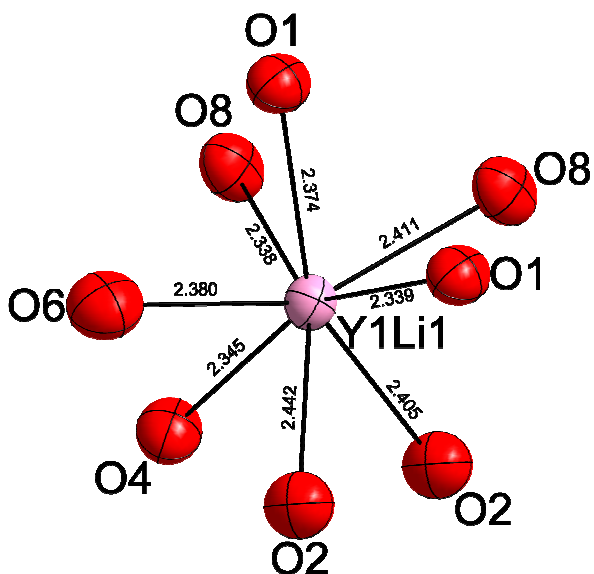

Fig. S1 ORTEP style representation of  $M1O_8$ -coordination polyhedra ( $M1$ : 75%Y + 25%Li) in  $Li_{3.5}Y_{1.5}(MoO_4)_4$ . Ellipsoids at 90% probability level.

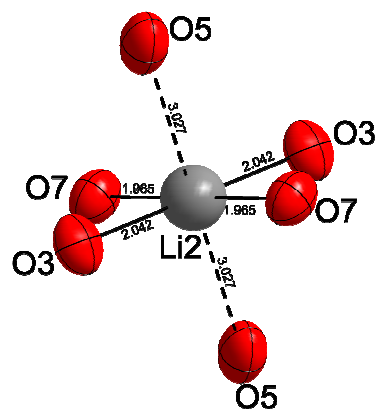

Fig. S4 ORTEP style representation of  $Li_2O_4$ -coordination polyhedra in  $Li_{3.5}Y_{1.5}(MoO_4)_4$ . Ellipsoids at 90% probability level.

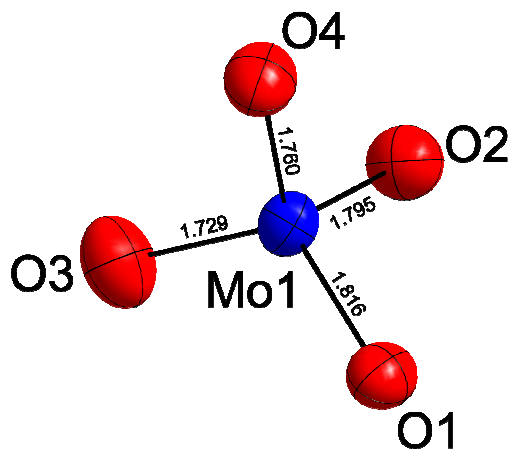

Fig. S2 ORTEP style representation of  $Mo_1O_4$ -coordination polyhedra in  $Li_{3.5}Y_{1.5}(MoO_4)_4$ . Ellipsoids at 90% probability level.

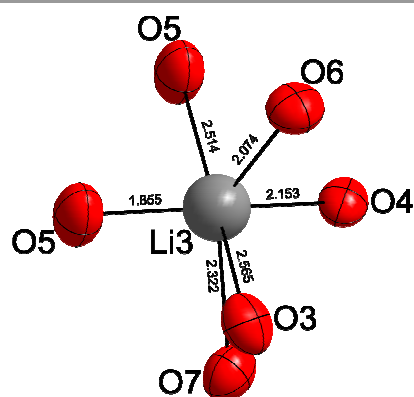

Fig. S5 ORTEP style representation of  $Li_3O_4$ -coordination polyhedra in  $Li_{3.5}Y_{1.5}(MoO_4)_4$ . Ellipsoids at 90% probability level.

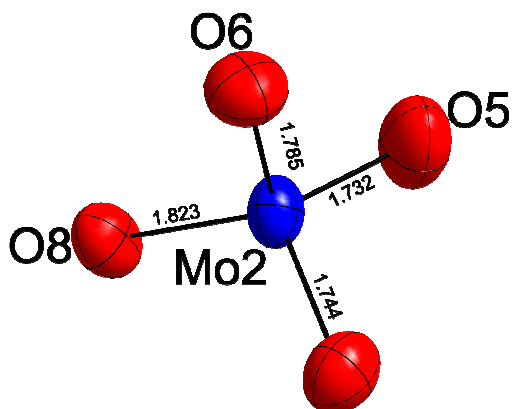

Fig. S3 ORTEP style representation of  $Mo_2O_4$ -coordination polyhedra in  $Li_{3.5}Y_{1.5}(MoO_4)_4$ . Ellipsoids at 90% probability level.
